# Supplementary material
Source: HighWire-hosted journal article supplement (https://erj.ersjournals.com/content/56/6/2000386)
Supplement: inline-supplementary-material-1 [file inline-supplementary-material-1.pdf]

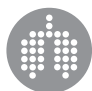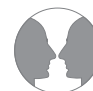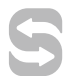

SHAREABLE PDF

# The perennial issue of gender discrepancy in publications on chest diseases

Fatma Tokgoz Akyil<sup>1</sup>, Emre Saygili<sup>2</sup> and Mustafa Akyil<sup>3</sup>

**Affiliations:** <sup>1</sup>Yedikule Chest Diseases and Thoracic Surgery Training and Research Hospital, Dept of Chest Diseases, Istanbul, Turkey. <sup>2</sup>Canakkale Mehmet Akif Ersoy State Hospital, Dept of Endocrinology, Canakkale, Turkey. <sup>3</sup>Sureyyapasa Chest Diseases and Thoracic Surgery Training and Research Hospital, Dept of Thoracic Surgery, Istanbul, Turkey.

**Correspondence:** Fatma Tokgoz Akyil, Yedikule Gogus Hastaliklari Hastanesi, Gogus Hastaliklari Klinigi, Kazlıcesme, Zeytinburnu, Istanbul, Turkey. E-mail: fatmatokgoz86@gmail.com

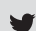

@ERSpublications

This letter gives a concrete picture of the lack of equal opportunities for women in academia, and raises awareness for professionals and policy makers to level the playing field and to enable women to contribute more to the accumulation of knowledge. <https://bit.ly/2UumeNK>

**Cite this article as:** Tokgoz Akyil F, Saygili E, Akyil M. The perennial issue of gender discrepancy in publications on chest diseases. *Eur Respir J* 2020; 56: 2000386 [<https://doi.org/10.1183/13993003.00386-2020>].

This single-page version can be shared freely online.

## To the Editor:

Scientific research, academic presentations and academic publications are demonstrators of success, enabling career progression, administrative promotions including departmental chairs and national/international recognition. However, maternity, housework, family responsibilities and other gender issues may force females to allocate only a limited time for academic practice.
